# Supplementary material for: DeltaN TP63 reactivation, epithelial phenotype maintenance, and survival in lung squamous cell carcinoma
Source: Springer Nature journal article supplement (doi:10.1007/s13277-011-0239-5), 2011-10-10
Supplement: MOESM1 [file 13277_2011_239_MOESM1_ESM.xls]

## Sheet: Feuil1
	TP63 and PI3KCA qPCR Primers and probes
	Primer U	Primer L	Taqman Probe
PI3KCA	TCTTTGATTTAGGTTTCTGCTTTGG	TGTTCTGATTCTTTGCAAGTTTTACA	AACCATACATCTAATTCC
TP63	TCCTCCACCAGCGTTTCG	TTCGTTTCTTGATGGATGTCATCT	CAGAACACACATGGTATC
HSA	TGTTGCATGAGAAAACGCCA	GTCGCCTGTTCACCAAGGAT	AAGTGACAGAGTCACCAA
TP63 isoforms RTPCR Primers
TA-TP63	TGTATCCGCATGCAGGACT	CTGTGTTATAGGGACTGGTGGAC
DN-TP63	GAAAACAATGCCCAGACTCAA	TGCGCGTGGTCTGTGTTA
qRTPCR sybergreen assays Primers
CDH1	GGAACTATGAAAAGTGGGCTTG	AAATTGCCAGGCTCAATGAC
CDH2	CTTGTCAGGATCAGGTCT	GAAGATACCAGTTGGAGGCT
VIM	ATCCAAGTTTGCTGACCTCTCTGAG	AGGGACTGCACCTGTCTCCGGT
JUP	CAGCAGCCCTACACGGATGGTGTGA	CGGTTCATGGGGTCCCGGGC
YAP1	CACAGCATGTTCGAGC	GATGCTGAGCTGTGGGTGTA
RPL13A	CATGAGGCTACGGAAACAGGC	AAGGGCAGGCAACGCATGA
POLR2A	TCTTCTGCTCCAAACTGCTTGTGG	GTCGTAGACATGTGTGAGC
qRTPCR Taqman probe assays
DNTP63	Hs00978339-m1
TATP63	Hs00186613-m1
TWIST1	Hs00361186-m1
SNAIL	Hs00195591-m1
YAP1	Hs00371735-m1
RPL13A	Hs03043885-g1
POLR2A	Hs01108291-m1
